# Supplementary material for: New Caledonian crows keep ‘valuable’ hooked tools safer than basic non-hooked tools
Source: eLife. 2021 Dec 21;10:e64829. doi: 10.7554/eLife.64829 (PMC8691834; doi:10.7554/eLife.64829)
Supplement: Source data 1. [file elife-64829-supp2.csv]

BirdID	sex	age	gape	trial	hole	extraction	tool_ok	tool_type	tool	maker	material	bait	initial_safekeeping	final_safekeeping	bait_on_ground
AM7	M	adult	90	100sticks	4	y	y	stick	stick	crow	stick	S	foot	foot	n
AM7	M	adult	90	100sticks	5	y	y	stick	stick	crow	stick	M	foot	foot	n
AM7	M	adult	90	100sticks	8	y	y	stick	stick	crow	stick	S	foot	foot	n
AM7	M	adult	90	100sticks	11	y	y	stick	stick	crow	stick	S	corresponding_extraction_hole	corresponding_extraction_hole	n
AM7	M	adult	90	desmanthus	1	y	y	hook	hook	crow	mimosa	M	foot	foot	n
AM7	M	adult	90	desmanthus	2	y	y	hook	hook	crow	mimosa	M	foot	foot	n
AM7	M	adult	90	desmanthus	3	y	y	hook	hook	crow	mimosa	M	foot	foot	n
AM7	M	adult	90	desmanthus	5	y	y	hook	hook	crow	mimosa	M	foot	foot	n
AM7	M	adult	90	desmanthus	7	y	y	hook	hook	crow	mimosa	M	foot	foot	n
AM7	M	adult	90	desmanthus	9	y	y	hook	hook	crow	mimosa	M	foot	foot	n
AM7	M	adult	90	desmanthus	12	y	y	hook	hook	crow	mimosa	M	foot	foot	n
AM7	M	adult	90	desmanthus	15	y	y	hook	hook	crow	mimosa	M	foot	foot	n
AM7	M	adult	90	desmanthus	16	y	y	hook	hook	crow	mimosa	M	foot	foot	n
AM7	M	adult	90	desmanthus	17	y	y	hook	hook	crow	mimosa	M	foot	foot	n
AM7	M	adult	90	desmanthus	18	y	y	hook	hook	crow	mimosa	M	foot	foot	n
AM7	M	adult	90	matchedhook	1	y	y	matched_hook	hook	human	mimosa	M	foot	foot	n
AM7	M	adult	90	matchedhook	2	y	y	matched_hook	hook	human	mimosa	M	foot	foot	n
AM7	M	adult	90	matchedhook	3	y	y	matched_hook	hook	human	mimosa	M	foot	foot	n
AM7	M	adult	90	matchedhook	4	y	y	matched_hook	hook	human	mimosa	S	foot	foot	n
AM7	M	adult	90	matchedhook	5	y	y	matched_hook	hook	human	mimosa	M	foot	foot	n
AM7	M	adult	90	matchedhook	6	y	y	matched_hook	hook	human	mimosa	M	foot	foot	n
AM7	M	adult	90	matchedhook	8	y	y	matched_hook	hook	human	mimosa	S	corresponding_extraction_hole	corresponding_extraction_hole	n
AM7	M	adult	90	matchedhook	9	y	y	matched_hook	hook	human	mimosa	M	foot	ground	n
AM7	M	adult	90	matchedhook	10	y	y	matched_hook	hook	human	mimosa	S	ground	ground	y
AM7	M	adult	90	matchedhook	11	y	y	matched_hook	hook	human	mimosa	S	foot	foot	n
AM7	M	adult	90	matchedhook	12	y	y	matched_hook	hook	human	mimosa	M	foot	foot	n
AM7	M	adult	90	matchedhook	13	y	y	matched_hook	hook	human	mimosa	S	corresponding_extraction_hole	corresponding_extraction_hole	y
AM7	M	adult	90	matchedhook	14	y	y	matched_hook	hook	human	mimosa	S	foot	ground	y
AM7	M	adult	90	matchedhook	15	y	y	matched_hook	hook	human	mimosa	M	corresponding_extraction_hole	corresponding_extraction_hole	n
AM7	M	adult	90	matchedhook	16	y	y	matched_hook	hook	human	mimosa	M	foot	foot	n
AM7	M	adult	90	matchedhook	17	y	y	matched_hook	hook	human	mimosa	M	foot	foot	n
AM7	M	adult	90	matchedhook	18	y	y	matched_hook	hook	human	mimosa	M	foot	foot	n
AM7	M	adult	90	matchedstick	1	y	y	matched_stick	stick	human	mimosa	M	foot	ground	n
AM7	M	adult	90	matchedstick	4	y	y	matched_stick	stick	human	mimosa	S	ground	ground	y
AM7	M	adult	90	matchedstick	5	y	y	matched_stick	stick	human	mimosa	M	foot	foot	n
AM7	M	adult	90	matchedstick	7	y	y	matched_stick	stick	human	mimosa	M	foot	foot	n
AM7	M	adult	90	matchedstick	8	y	y	matched_stick	stick	human	mimosa	S	foot	foot	n
AM7	M	adult	90	matchedstick	10	y	y	matched_stick	stick	human	mimosa	S	ground	ground	y
AM7	M	adult	90	matchedstick	12	y	y	matched_stick	stick	human	mimosa	M	foot	foot	n
AM7	M	adult	90	matchedstick	13	y	y	matched_stick	stick	human	mimosa	S	corresponding_extraction_hole	corresponding_extraction_hole	n
AM7	M	adult	90	matchedstick	14	y	y	matched_stick	stick	human	mimosa	S	corresponding_extraction_hole	ground	n
AM7	M	adult	90	matchedstick	16	y	y	matched_stick	stick	human	mimosa	M	log	foot	n
AM7	M	adult	90	matchedstick	17	y	y	matched_stick	stick	human	mimosa	M	foot	foot	n
AM7	M	adult	90	matchedstick	18	y	y	matched_stick	stick	human	mimosa	M	foot	foot	n
AN1	F	immature	25	100sticks	1	y	y	stick	stick	crow	stick	M	corresponding_extraction_hole	corresponding_extraction_hole	n
AN1	F	immature	25	100sticks	5	y	y	stick	stick	crow	stick	M	corresponding_extraction_hole	corresponding_extraction_hole	n
AN1	F	immature	25	100sticks	7	y	y	stick	stick	crow	stick	S	foot	ground	y
AN1	F	immature	25	100sticks	8	y	y	stick	stick	crow	stick	M	foot	foot	n
AN1	F	immature	25	100sticks	10	y	y	stick	stick	crow	stick	M	foot	foot	n
AN1	F	immature	25	100sticks	17	y	y	stick	stick	crow	stick	S	foot	foot	n
AN1	F	immature	25	desmanthus	1	y	y	hook	hook	crow	mimosa	M	corresponding_extraction_hole	corresponding_extraction_hole	n
AN1	F	immature	25	desmanthus	2	y	y	hook	hook	crow	mimosa	M	corresponding_extraction_hole	corresponding_extraction_hole	n
AN1	F	immature	25	desmanthus	3	y	y	hook	hook	crow	mimosa	M	corresponding_extraction_hole	corresponding_extraction_hole	n
AN1	F	immature	25	desmanthus	4	y	y	hook	hook	crow	mimosa	S	corresponding_extraction_hole	corresponding_extraction_hole	n
AN1	F	immature	25	desmanthus	5	y	y	hook	hook	crow	mimosa	M	corresponding_extraction_hole	corresponding_extraction_hole	n
AN1	F	immature	25	desmanthus	6	y	y	hook	hook	crow	mimosa	M	corresponding_extraction_hole	corresponding_extraction_hole	n
AN1	F	immature	25	desmanthus	7	y	y	hook	hook	crow	mimosa	S	corresponding_extraction_hole	corresponding_extraction_hole	n
AN1	F	immature	25	desmanthus	8	y	y	hook	hook	crow	mimosa	S	corresponding_extraction_hole	corresponding_extraction_hole	n
AN1	F	immature	25	desmanthus	9	y	y	hook	hook	crow	mimosa	M	corresponding_extraction_hole	corresponding_extraction_hole	n
AN1	F	immature	25	desmanthus	10	y	y	hook	hook	crow	mimosa	M	corresponding_extraction_hole	corresponding_extraction_hole	n
AN1	F	immature	25	desmanthus	11	y	y	hook	hook	crow	mimosa	S	ground	ground	y
AN1	F	immature	25	desmanthus	12	y	y	hook	hook	crow	mimosa	M	corresponding_extraction_hole	corresponding_extraction_hole	n
AN1	F	immature	25	desmanthus	13	y	y	hook	hook	crow	mimosa	M	corresponding_extraction_hole	ground	y
AN1	F	immature	25	desmanthus	14	y	y	hook	hook	crow	mimosa	M	corresponding_extraction_hole	corresponding_extraction_hole	n
AN1	F	immature	25	desmanthus	16	y	y	hook	hook	crow	mimosa	M	corresponding_extraction_hole	corresponding_extraction_hole	n
AN1	F	immature	25	desmanthus	17	y	y	hook	hook	crow	mimosa	S	corresponding_extraction_hole	corresponding_extraction_hole	n
AN1	F	immature	25	desmanthus	18	y	y	hook	hook	crow	mimosa	M	corresponding_extraction_hole	ground	y
AN1	F	immature	25	matchedhook	1	y	y	matched_hook	hook	human	mimosa	M	corresponding_extraction_hole	corresponding_extraction_hole	n
AN1	F	immature	25	matchedhook	2	y	y	matched_hook	hook	human	mimosa	M	corresponding_extraction_hole	corresponding_extraction_hole	n
AN1	F	immature	25	matchedhook	3	y	y	matched_hook	hook	human	mimosa	M	corresponding_extraction_hole	corresponding_extraction_hole	n
AN1	F	immature	25	matchedhook	4	y	y	matched_hook	hook	human	mimosa	S	corresponding_extraction_hole	corresponding_extraction_hole	n
AN1	F	immature	25	matchedhook	5	y	y	matched_hook	hook	human	mimosa	M	corresponding_extraction_hole	corresponding_extraction_hole	n
AN1	F	immature	25	matchedhook	6	y	y	matched_hook	hook	human	mimosa	M	corresponding_extraction_hole	corresponding_extraction_hole	n
AN1	F	immature	25	matchedhook	7	y	y	matched_hook	hook	human	mimosa	S	corresponding_extraction_hole	corresponding_extraction_hole	n
AN1	F	immature	25	matchedhook	8	y	y	matched_hook	hook	human	mimosa	S	corresponding_extraction_hole	corresponding_extraction_hole	n
AN1	F	immature	25	matchedhook	9	y	y	matched_hook	hook	human	mimosa	M	corresponding_extraction_hole	corresponding_extraction_hole	n
AN1	F	immature	25	matchedhook	10	y	y	matched_hook	hook	human	mimosa	M	corresponding_extraction_hole	corresponding_extraction_hole	n
AN1	F	immature	25	matchedhook	11	y	y	matched_hook	hook	human	mimosa	S	corresponding_extraction_hole	corresponding_extraction_hole	n
AN1	F	immature	25	matchedhook	12	y	y	matched_hook	hook	human	mimosa	M	corresponding_extraction_hole	corresponding_extraction_hole	n
AN1	F	immature	25	matchedhook	13	y	y	matched_hook	hook	human	mimosa	M	corresponding_extraction_hole	corresponding_extraction_hole	n
AN1	F	immature	25	matchedhook	14	y	y	matched_hook	hook	human	mimosa	M	corresponding_extraction_hole	corresponding_extraction_hole	n
AN1	F	immature	25	matchedhook	15	y	y	matched_hook	hook	human	mimosa	M	corresponding_extraction_hole	corresponding_extraction_hole	n
AN1	F	immature	25	matchedhook	16	y	y	matched_hook	hook	human	mimosa	S	corresponding_extraction_hole	corresponding_extraction_hole	n
AN1	F	immature	25	matchedhook	17	y	y	matched_hook	hook	human	mimosa	S	corresponding_extraction_hole	corresponding_extraction_hole	n
AN1	F	immature	25	matchedhook	18	y	y	matched_hook	hook	human	mimosa	M	corresponding_extraction_hole	corresponding_extraction_hole	n
AN1	F	immature	25	matchedstick	4	y	y	matched_stick	stick	human	mimosa	S	corresponding_extraction_hole	corresponding_extraction_hole	n
AN1	F	immature	25	matchedstick	7	y	y	matched_stick	stick	human	mimosa	S	corresponding_extraction_hole	corresponding_extraction_hole	n
AN1	F	immature	25	matchedstick	8	y	y	matched_stick	stick	human	mimosa	S	corresponding_extraction_hole	corresponding_extraction_hole	n
AN1	F	immature	25	matchedstick	11	y	y	matched_stick	stick	human	mimosa	S	corresponding_extraction_hole	corresponding_extraction_hole	n
AN1	F	immature	25	matchedstick	14	y	y	matched_stick	stick	human	mimosa	M	ground	ground	n
AN1	F	immature	25	matchedstick	16	y	y	matched_stick	stick	human	mimosa	S	corresponding_extraction_hole	corresponding_extraction_hole	n
AN1	F	immature	25	matchedstick	17	y	y	matched_stick	stick	human	mimosa	S	corresponding_extraction_hole	corresponding_extraction_hole	n
AN8	F	juvenile	3	100sticks	1	y	y	stick	stick	crow	stick	S	ground	ground	n
AN8	F	juvenile	3	100sticks	2	y	y	stick	stick	crow	stick	M	foot	foot	n
AN8	F	juvenile	3	100sticks	4	y	y	stick	stick	crow	stick	M	foot	foot	n
AN8	F	juvenile	3	100sticks	5	y	y	stick	stick	crow	stick	M	foot	foot	n
AN8	F	juvenile	3	100sticks	7	y	y	stick	stick	crow	stick	S	corresponding_extraction_hole	corresponding_extraction_hole	n
AN8	F	juvenile	3	100sticks	10	y	y	stick	stick	crow	stick	S	ground	ground	y
AN8	F	juvenile	3	100sticks	11	y	y	stick	stick	crow	stick	S	ground	ground	y
AN8	F	juvenile	3	100sticks	13	y	y	stick	stick	crow	stick	S	ground	ground	n
AN8	F	juvenile	3	100sticks	16	y	y	stick	stick	crow	stick	S	ground	ground	n
AN8	F	juvenile	3	100sticks	17	y	y	stick	stick	crow	stick	M	foot	foot	y
AN8	F	juvenile	3	100sticks	18	y	y	stick	stick	crow	stick	M	foot	foot	y
AN8	F	juvenile	3	desmanthus	1	y	y	hook	hook	crow	mimosa	S	foot	foot	n
AN8	F	juvenile	3	desmanthus	2	y	y	hook	hook	crow	mimosa	M	foot	foot	n
AN8	F	juvenile	3	desmanthus	3	y	y	hook	hook	crow	mimosa	M	foot	ground	n
AN8	F	juvenile	3	desmanthus	4	y	y	hook	hook	crow	mimosa	M	foot	foot	n
AN8	F	juvenile	3	desmanthus	5	y	y	hook	hook	crow	mimosa	M	foot	foot	n
AN8	F	juvenile	3	desmanthus	6	y	y	hook	hook	crow	mimosa	M	foot	foot	n
AN8	F	juvenile	3	desmanthus	7	y	y	hook	hook	crow	mimosa	S	foot	foot	n
AN8	F	juvenile	3	desmanthus	8	y	y	hook	hook	crow	mimosa	M	foot	foot	n
AN8	F	juvenile	3	desmanthus	9	y	y	hook	hook	crow	mimosa	M	foot	foot	n
AN8	F	juvenile	3	desmanthus	10	y	y	hook	hook	crow	mimosa	S	foot	foot	n
AN8	F	juvenile	3	desmanthus	11	y	y	hook	hook	crow	mimosa	S	corresponding_extraction_hole	corresponding_extraction_hole	n
AN8	F	juvenile	3	desmanthus	13	y	y	hook	hook	crow	mimosa	S	foot	foot	n
AN8	F	juvenile	3	desmanthus	14	y	y	hook	hook	crow	mimosa	M	foot	foot	n
AN8	F	juvenile	3	desmanthus	15	y	y	hook	hook	crow	mimosa	M	foot	foot	n
AN8	F	juvenile	3	desmanthus	16	y	y	hook	hook	crow	mimosa	S	foot	foot	n
AN8	F	juvenile	3	desmanthus	17	y	y	hook	hook	crow	mimosa	M	foot	foot	n
AN8	F	juvenile	3	desmanthus	18	y	y	hook	hook	crow	mimosa	M	foot	foot	n
AN8	F	juvenile	3	matchedhook	1	y	y	matched_hook	hook	human	mimosa	S	ground	ground	n
AN8	F	juvenile	3	matchedhook	2	y	y	matched_hook	hook	human	mimosa	M	foot	ground	n
AN8	F	juvenile	3	matchedhook	3	y	y	matched_hook	hook	human	mimosa	M	foot	foot	n
AN8	F	juvenile	3	matchedhook	4	y	y	matched_hook	hook	human	mimosa	M	foot	foot	n
AN8	F	juvenile	3	matchedhook	5	y	y	matched_hook	hook	human	mimosa	M	foot	foot	n
AN8	F	juvenile	3	matchedhook	7	y	y	matched_hook	hook	human	mimosa	S	foot	foot	n
AN8	F	juvenile	3	matchedhook	8	y	y	matched_hook	hook	human	mimosa	M	foot	foot	n
AN8	F	juvenile	3	matchedhook	9	y	y	matched_hook	hook	human	mimosa	M	foot	foot	n
AN8	F	juvenile	3	matchedhook	10	y	y	matched_hook	hook	human	mimosa	S	foot	foot	y
AN8	F	juvenile	3	matchedhook	11	y	y	matched_hook	hook	human	mimosa	S	ground	ground	y
AN8	F	juvenile	3	matchedhook	12	y	y	matched_hook	hook	human	mimosa	M	foot	foot	n
AN8	F	juvenile	3	matchedhook	13	y	y	matched_hook	hook	human	mimosa	S	foot	foot	n
AN8	F	juvenile	3	matchedhook	14	y	y	matched_hook	hook	human	mimosa	M	corresponding_extraction_hole	corresponding_extraction_hole	n
AN8	F	juvenile	3	matchedhook	15	y	y	matched_hook	hook	human	mimosa	M	foot	ground	n
AN8	F	juvenile	3	matchedhook	16	y	y	matched_hook	hook	human	mimosa	S	foot	foot	n
AN8	F	juvenile	3	matchedhook	17	y	y	matched_hook	hook	human	mimosa	M	foot	foot	n
AN8	F	juvenile	3	matchedhook	18	y	y	matched_hook	hook	human	mimosa	M	foot	foot	n
AN8	F	juvenile	3	matchedstick	2	y	y	matched_stick	stick	human	mimosa	M	foot	foot	n
AN8	F	juvenile	3	matchedstick	4	y	y	matched_stick	stick	human	mimosa	M	foot	foot	n
AN8	F	juvenile	3	matchedstick	5	y	y	matched_stick	stick	human	mimosa	M	ground	ground	y
AN8	F	juvenile	3	matchedstick	7	y	y	matched_stick	stick	human	mimosa	S	ground	ground	n
AN8	F	juvenile	3	matchedstick	8	y	y	matched_stick	stick	human	mimosa	M	ground	ground	y
AN8	F	juvenile	3	matchedstick	9	y	y	matched_stick	stick	human	mimosa	M	foot	foot	n
AN8	F	juvenile	3	matchedstick	10	y	y	matched_stick	stick	human	mimosa	S	ground	ground	n
AN8	F	juvenile	3	matchedstick	16	y	y	matched_stick	stick	human	mimosa	S	ground	ground	y
AN8	F	juvenile	3	matchedstick	18	y	y	matched_stick	stick	human	mimosa	M	ground	ground	y
AN9	F	adult	95	desmanthus	13	y	y	hook	hook	crow	mimosa	M	foot	foot	n
AN9	F	adult	95	desmanthus	16	y	y	hook	hook	crow	mimosa	M	ground	ground	y
AN9	F	adult	95	desmanthus	17	y	y	hook	hook	crow	mimosa	M	foot	foot	n
AP0	F	immature	60	100sticks	19	y	y	stick	stick	crow	stick	M	foot	foot	n
AP0	F	immature	60	100sticks	20	y	y	stick	stick	crow	stick	S	foot	foot	n
AP0	F	immature	60	100sticks	21	y	y	stick	stick	crow	stick	M	corresponding_extraction_hole	corresponding_extraction_hole	n
AP0	F	immature	60	100sticks	22	y	y	stick	stick	crow	stick	M	foot	foot	n
AP0	F	immature	60	100sticks	25	y	y	stick	stick	crow	stick	S	foot	ground	n
AP0	F	immature	60	100sticks	26	y	y	stick	stick	crow	stick	M	foot	foot	n
AP0	F	immature	60	100sticks	27	y	y	stick	stick	crow	stick	M	foot	foot	n
AP0	F	immature	60	100sticks	28	y	y	stick	stick	crow	stick	M	foot	foot	n
AP0	F	immature	60	100sticks	29	y	y	stick	stick	crow	stick	S	foot	foot	n
AP0	F	immature	60	100sticks	31	y	y	stick	stick	crow	stick	S	foot	foot	n
AP0	F	immature	60	100sticks	32	y	y	stick	stick	crow	stick	M	foot	foot	n
AP0	F	immature	60	100sticks	34	y	y	stick	stick	crow	stick	S	corresponding_extraction_hole	corresponding_extraction_hole	y
AP0	F	immature	60	100sticks	35	y	y	stick	stick	crow	stick	M	foot	foot	n
AP0	F	immature	60	desmanthus	19	y	y	hook	hook	crow	mimosa	M	corresponding_extraction_hole	corresponding_extraction_hole	n
AP0	F	immature	60	desmanthus	21	y	y	hook	hook	crow	mimosa	M	foot	foot	n
AP0	F	immature	60	desmanthus	24	y	y	hook	hook	crow	mimosa	M	corresponding_extraction_hole	corresponding_extraction_hole	n
AP0	F	immature	60	desmanthus	26	y	y	hook	hook	crow	mimosa	M	corresponding_extraction_hole	corresponding_extraction_hole	n
AP0	F	immature	60	desmanthus	28	y	y	hook	hook	crow	mimosa	M	corresponding_extraction_hole	corresponding_extraction_hole	n
AP0	F	immature	60	desmanthus	33	y	y	hook	hook	crow	mimosa	M	corresponding_extraction_hole	corresponding_extraction_hole	n
AP0	F	immature	60	desmanthus	35	y	y	hook	hook	crow	mimosa	M	corresponding_extraction_hole	corresponding_extraction_hole	n
AP0	F	immature	60	desmanthus	36	y	y	hook	hook	crow	mimosa	M	corresponding_extraction_hole	corresponding_extraction_hole	n
CE0	M	adult	100	100sticks	1	y	y	stick	stick	crow	stick	M	ground	ground	n
CE0	M	adult	100	100sticks	2	y	y	stick	stick	crow	stick	S	corresponding_extraction_hole	corresponding_extraction_hole	n
CE0	M	adult	100	100sticks	3	y	y	stick	stick	crow	stick	M	foot	foot	n
CE0	M	adult	100	100sticks	4	y	y	stick	stick	crow	stick	S	corresponding_extraction_hole	corresponding_extraction_hole	n
CE0	M	adult	100	100sticks	5	y	y	stick	stick	crow	stick	M	foot	foot	n
CE0	M	adult	100	100sticks	6	y	y	stick	stick	crow	stick	M	corresponding_extraction_hole	corresponding_extraction_hole	n
CE0	M	adult	100	100sticks	7	y	y	stick	stick	crow	stick	M	foot	foot	n
CE0	M	adult	100	100sticks	8	y	y	stick	stick	crow	stick	S	corresponding_extraction_hole	corresponding_extraction_hole	n
CE0	M	adult	100	100sticks	10	y	y	stick	stick	crow	stick	M	foot	foot	n
CE0	M	adult	100	100sticks	11	y	y	stick	stick	crow	stick	M	foot	foot	n
CE0	M	adult	100	100sticks	12	y	y	stick	stick	crow	stick	M	foot	foot	n
CE0	M	adult	100	100sticks	13	y	y	stick	stick	crow	stick	S	ground	ground	n
CE0	M	adult	100	100sticks	14	y	y	stick	stick	crow	stick	S	log	log	n
CE0	M	adult	100	100sticks	16	y	y	stick	stick	crow	stick	S	corresponding_extraction_hole	corresponding_extraction_hole	n
CE0	M	adult	100	100sticks	18	y	y	stick	stick	crow	stick	M	foot	foot	n
CE0	M	adult	100	desmanthus	1	y	y	hook	hook	crow	mimosa	M	corresponding_extraction_hole	corresponding_extraction_hole	n
CE0	M	adult	100	desmanthus	2	y	y	hook	hook	crow	mimosa	S	corresponding_extraction_hole	corresponding_extraction_hole	n
CE0	M	adult	100	desmanthus	3	y	y	hook	hook	crow	mimosa	M	corresponding_extraction_hole	log	n
CE0	M	adult	100	desmanthus	4	y	y	hook	hook	crow	mimosa	S	corresponding_extraction_hole	foot	n
CE0	M	adult	100	desmanthus	5	y	y	hook	hook	crow	mimosa	M	corresponding_extraction_hole	corresponding_extraction_hole	n
CE0	M	adult	100	desmanthus	6	y	y	hook	hook	crow	mimosa	M	corresponding_extraction_hole	corresponding_extraction_hole	n
CE0	M	adult	100	desmanthus	8	y	y	hook	hook	crow	mimosa	S	corresponding_extraction_hole	corresponding_extraction_hole	n
CE0	M	adult	100	desmanthus	9	y	y	hook	hook	crow	mimosa	M	corresponding_extraction_hole	corresponding_extraction_hole	n
CE0	M	adult	100	desmanthus	10	y	y	hook	hook	crow	mimosa	M	corresponding_extraction_hole	corresponding_extraction_hole	n
CE0	M	adult	100	desmanthus	11	y	y	hook	hook	crow	mimosa	M	corresponding_extraction_hole	corresponding_extraction_hole	y
CE0	M	adult	100	desmanthus	12	y	y	hook	hook	crow	mimosa	M	foot	foot	n
CE0	M	adult	100	desmanthus	13	y	y	hook	hook	crow	mimosa	S	corresponding_extraction_hole	corresponding_extraction_hole	n
CE0	M	adult	100	desmanthus	14	y	y	hook	hook	crow	mimosa	S	corresponding_extraction_hole	corresponding_extraction_hole	n
CE0	M	adult	100	desmanthus	16	y	y	hook	hook	crow	mimosa	S	corresponding_extraction_hole	corresponding_extraction_hole	n
CE0	M	adult	100	desmanthus	17	y	y	hook	hook	crow	mimosa	M	corresponding_extraction_hole	corresponding_extraction_hole	n
CE0	M	adult	100	desmanthus	18	y	y	hook	hook	crow	mimosa	M	corresponding_extraction_hole	corresponding_extraction_hole	n
CE0	M	adult	100	matchedhook	1	y	y	matched_hook	hook	human	mimosa	M	corresponding_extraction_hole	corresponding_extraction_hole	n
CE0	M	adult	100	matchedhook	2	y	y	matched_hook	hook	human	mimosa	S	corresponding_extraction_hole	corresponding_extraction_hole	n
CE0	M	adult	100	matchedhook	3	y	y	matched_hook	hook	human	mimosa	M	corresponding_extraction_hole	other_extraction_hole	n
CE0	M	adult	100	matchedhook	4	y	y	matched_hook	hook	human	mimosa	S	corresponding_extraction_hole	corresponding_extraction_hole	n
CE0	M	adult	100	matchedhook	5	y	y	matched_hook	hook	human	mimosa	M	corresponding_extraction_hole	corresponding_extraction_hole	n
CE0	M	adult	100	matchedhook	6	y	y	matched_hook	hook	human	mimosa	M	corresponding_extraction_hole	corresponding_extraction_hole	n
CE0	M	adult	100	matchedhook	8	y	y	matched_hook	hook	human	mimosa	S	corresponding_extraction_hole	corresponding_extraction_hole	n
CE0	M	adult	100	matchedhook	9	y	y	matched_hook	hook	human	mimosa	M	corresponding_extraction_hole	corresponding_extraction_hole	n
CE0	M	adult	100	matchedhook	10	y	y	matched_hook	hook	human	mimosa	M	corresponding_extraction_hole	corresponding_extraction_hole	n
CE0	M	adult	100	matchedhook	13	y	y	matched_hook	hook	human	mimosa	S	corresponding_extraction_hole	corresponding_extraction_hole	n
CE0	M	adult	100	matchedhook	14	y	y	matched_hook	hook	human	mimosa	S	corresponding_extraction_hole	corresponding_extraction_hole	n
CE0	M	adult	100	matchedhook	15	y	y	matched_hook	hook	human	mimosa	M	corresponding_extraction_hole	corresponding_extraction_hole	n
CE0	M	adult	100	matchedhook	16	y	y	matched_hook	hook	human	mimosa	S	corresponding_extraction_hole	corresponding_extraction_hole	n
CE0	M	adult	100	matchedhook	17	y	y	matched_hook	hook	human	mimosa	M	other_extraction_hole	other_extraction_hole	n
CE0	M	adult	100	matchedstick	1	y	y	matched_stick	stick	human	mimosa	M	foot	foot	n
CE0	M	adult	100	matchedstick	2	y	y	matched_stick	stick	human	mimosa	S	corresponding_extraction_hole	corresponding_extraction_hole	n
CE0	M	adult	100	matchedstick	3	y	y	matched_stick	stick	human	mimosa	M	corresponding_extraction_hole	corresponding_extraction_hole	n
CE0	M	adult	100	matchedstick	4	y	y	matched_stick	stick	human	mimosa	S	corresponding_extraction_hole	corresponding_extraction_hole	y
CE0	M	adult	100	matchedstick	6	y	y	matched_stick	stick	human	mimosa	M	corresponding_extraction_hole	corresponding_extraction_hole	n
CE0	M	adult	100	matchedstick	7	y	y	matched_stick	stick	human	mimosa	M	foot	foot	n
CE0	M	adult	100	matchedstick	8	y	y	matched_stick	stick	human	mimosa	S	corresponding_extraction_hole	corresponding_extraction_hole	n
CE0	M	adult	100	matchedstick	9	y	y	matched_stick	stick	human	mimosa	M	corresponding_extraction_hole	foot	n
CE0	M	adult	100	matchedstick	13	y	y	matched_stick	stick	human	mimosa	S	corresponding_extraction_hole	corresponding_extraction_hole	y
CE0	M	adult	100	matchedstick	14	y	y	matched_stick	stick	human	mimosa	S	foot	foot	n
CE0	M	adult	100	matchedstick	15	y	y	matched_stick	stick	human	mimosa	M	foot	other_extraction_hole	n
CE0	M	adult	100	matchedstick	16	y	y	matched_stick	stick	human	mimosa	S	corresponding_extraction_hole	corresponding_extraction_hole	n
CE0	M	adult	100	matchedstick	17	y	y	matched_stick	stick	human	mimosa	M	foot	foot	n
CE0	M	adult	100	matchedstick	18	y	y	matched_stick	stick	human	mimosa	M	corresponding_extraction_hole	corresponding_extraction_hole	n
CR8	F	immature	75	100sticks	25	y	y	stick	stick	crow	stick	M	foot	foot	n
CR8	F	immature	75	100sticks	29	y	y	stick	stick	crow	stick	S	corresponding_extraction_hole	corresponding_extraction_hole	n
CR8	F	immature	75	100sticks	31	y	y	stick	stick	crow	stick	M	foot	foot	n
CR8	F	immature	75	100sticks	32	y	y	stick	stick	crow	stick	M	foot	foot	n
CR8	F	immature	75	100sticks	34	y	y	stick	stick	crow	stick	S	foot	foot	n
CR8	F	immature	75	100sticks	35	y	y	stick	stick	crow	stick	S	corresponding_extraction_hole	corresponding_extraction_hole	n
CR8	F	immature	75	desmanthus	19	y	y	hook	hook	crow	mimosa	M	foot	foot	n
CR8	F	immature	75	desmanthus	20	y	y	hook	hook	crow	mimosa	S	corresponding_extraction_hole	corresponding_extraction_hole	y
CR8	F	immature	75	desmanthus	21	y	y	hook	hook	crow	mimosa	M	corresponding_extraction_hole	foot	n
CR8	F	immature	75	desmanthus	22	y	y	hook	hook	crow	mimosa	M	foot	foot	n
CR8	F	immature	75	desmanthus	23	y	y	hook	hook	crow	mimosa	M	corresponding_extraction_hole	corresponding_extraction_hole	n
CR8	F	immature	75	desmanthus	24	y	y	hook	hook	crow	mimosa	M	foot	foot	n
CR8	F	immature	75	desmanthus	25	y	y	hook	hook	crow	mimosa	M	foot	foot	n
CR8	F	immature	75	desmanthus	26	y	y	hook	hook	crow	mimosa	S	corresponding_extraction_hole	foot	n
CR8	F	immature	75	desmanthus	27	y	y	hook	hook	crow	mimosa	M	corresponding_extraction_hole	corresponding_extraction_hole	y
CR8	F	immature	75	desmanthus	28	y	y	hook	hook	crow	mimosa	S	corresponding_extraction_hole	corresponding_extraction_hole	y
CR8	F	immature	75	desmanthus	29	y	y	hook	hook	crow	mimosa	S	corresponding_extraction_hole	corresponding_extraction_hole	n
CR8	F	immature	75	desmanthus	30	y	y	hook	hook	crow	mimosa	M	other_extraction_hole	other_extraction_hole	n
CR8	F	immature	75	desmanthus	31	y	y	hook	hook	crow	mimosa	M	foot	foot	n
CR8	F	immature	75	desmanthus	32	y	y	hook	hook	crow	mimosa	M	foot	foot	n
CR8	F	immature	75	desmanthus	33	y	y	hook	hook	crow	mimosa	M	corresponding_extraction_hole	corresponding_extraction_hole	n
CR8	F	immature	75	desmanthus	34	y	y	hook	hook	crow	mimosa	S	corresponding_extraction_hole	corresponding_extraction_hole	y
CR8	F	immature	75	desmanthus	35	y	y	hook	hook	crow	mimosa	S	corresponding_extraction_hole	corresponding_extraction_hole	n
CR8	F	immature	75	desmanthus	36	y	y	hook	hook	crow	mimosa	M	corresponding_extraction_hole	corresponding_extraction_hole	n
CR8	F	immature	75	matchedhook	19	y	y	matched_hook	hook	human	mimosa	M	foot	foot	n
CR8	F	immature	75	matchedhook	20	y	y	matched_hook	hook	human	mimosa	S	corresponding_extraction_hole	corresponding_extraction_hole	y
CR8	F	immature	75	matchedhook	21	y	y	matched_hook	hook	human	mimosa	M	corresponding_extraction_hole	corresponding_extraction_hole	n
CR8	F	immature	75	matchedhook	22	y	y	matched_hook	hook	human	mimosa	M	corresponding_extraction_hole	corresponding_extraction_hole	n
CR8	F	immature	75	matchedhook	23	y	y	matched_hook	hook	human	mimosa	M	foot	foot	n
CR8	F	immature	75	matchedhook	24	y	y	matched_hook	hook	human	mimosa	M	corresponding_extraction_hole	corresponding_extraction_hole	n
CR8	F	immature	75	matchedhook	26	y	y	matched_hook	hook	human	mimosa	S	foot	foot	n
CR8	F	immature	75	matchedhook	27	y	y	matched_hook	hook	human	mimosa	M	foot	foot	n
CR8	F	immature	75	matchedhook	28	y	y	matched_hook	hook	human	mimosa	S	corresponding_extraction_hole	corresponding_extraction_hole	n
CR8	F	immature	75	matchedhook	29	y	y	matched_hook	hook	human	mimosa	S	corresponding_extraction_hole	corresponding_extraction_hole	n
CR8	F	immature	75	matchedhook	30	y	y	matched_hook	hook	human	mimosa	M	foot	foot	n
CR8	F	immature	75	matchedhook	31	y	y	matched_hook	hook	human	mimosa	M	foot	foot	n
CR8	F	immature	75	matchedhook	32	y	y	matched_hook	hook	human	mimosa	M	foot	foot	n
CR8	F	immature	75	matchedhook	33	y	y	matched_hook	hook	human	mimosa	M	corresponding_extraction_hole	corresponding_extraction_hole	n
CR8	F	immature	75	matchedhook	34	y	y	matched_hook	hook	human	mimosa	S	foot	foot	n
CR8	F	immature	75	matchedhook	35	y	y	matched_hook	hook	human	mimosa	S	corresponding_extraction_hole	corresponding_extraction_hole	n
CR8	F	immature	75	matchedhook	36	y	y	matched_hook	hook	human	mimosa	M	foot	foot	n
CR8	F	immature	75	matchedstick	20	y	y	matched_stick	stick	human	mimosa	S	corresponding_extraction_hole	corresponding_extraction_hole	n
CR8	F	immature	75	matchedstick	28	y	y	matched_stick	stick	human	mimosa	S	corresponding_extraction_hole	corresponding_extraction_hole	y
CR8	F	immature	75	matchedstick	29	y	y	matched_stick	stick	human	mimosa	S	corresponding_extraction_hole	corresponding_extraction_hole	n
CR8	F	immature	75	matchedstick	35	y	y	matched_stick	stick	human	mimosa	S	corresponding_extraction_hole	corresponding_extraction_hole	n
CS9	F	juvenile	3	100sticks	2	y	y	stick	stick	crow	stick	S	corresponding_extraction_hole	other_extraction_hole	y
CS9	F	juvenile	3	desmanthus	1	y	y	hook	hook	crow	mimosa	S	corresponding_extraction_hole	corresponding_extraction_hole	y
CS9	F	juvenile	3	desmanthus	2	y	y	hook	hook	crow	mimosa	S	corresponding_extraction_hole	corresponding_extraction_hole	n
CS9	F	juvenile	3	desmanthus	5	y	y	hook	hook	crow	mimosa	M	foot	foot	n
CS9	F	juvenile	3	desmanthus	6	y	y	hook	hook	crow	mimosa	M	foot	foot	n
CS9	F	juvenile	3	desmanthus	7	y	y	hook	hook	crow	mimosa	M	corresponding_extraction_hole	corresponding_extraction_hole	n
CS9	F	juvenile	3	desmanthus	8	y	y	hook	hook	crow	mimosa	M	foot	foot	n
CS9	F	juvenile	3	desmanthus	9	y	y	hook	hook	crow	mimosa	M	foot	foot	n
CS9	F	juvenile	3	desmanthus	10	y	y	hook	hook	crow	mimosa	S	corresponding_extraction_hole	corresponding_extraction_hole	y
CS9	F	juvenile	3	desmanthus	13	y	y	hook	hook	crow	mimosa	M	corresponding_extraction_hole	corresponding_extraction_hole	n
CS9	F	juvenile	3	desmanthus	14	y	y	hook	hook	crow	mimosa	M	corresponding_extraction_hole	corresponding_extraction_hole	n
CS9	F	juvenile	3	desmanthus	17	y	y	hook	hook	crow	mimosa	M	corresponding_extraction_hole	corresponding_extraction_hole	n
CS9	F	juvenile	3	desmanthus	18	y	y	hook	hook	crow	mimosa	M	ground	foot	n
EM3	M	immature	30	100sticks	2	y	y	stick	stick	crow	stick	S	ground	ground	n
ER4	F	juvenile	5	desmanthus	19	y	y	hook	hook	crow	mimosa	M	foot	foot	n
ER4	F	juvenile	5	desmanthus	20	y	y	hook	hook	crow	mimosa	S	foot	foot	n
ER4	F	juvenile	5	desmanthus	22	y	y	hook	hook	crow	mimosa	M	foot	foot	n
ER4	F	juvenile	5	desmanthus	23	y	y	hook	hook	crow	mimosa	S	ground	ground	y
ER4	F	juvenile	5	desmanthus	25	y	y	hook	hook	crow	mimosa	M	foot	foot	n
ER4	F	juvenile	5	desmanthus	27	y	y	hook	hook	crow	mimosa	M	foot	foot	n
ER4	F	juvenile	5	desmanthus	28	y	y	hook	hook	crow	mimosa	S	corresponding_extraction_hole	corresponding_extraction_hole	n
ER4	F	juvenile	5	desmanthus	29	y	y	hook	hook	crow	mimosa	S	foot	foot	n
ER4	F	juvenile	5	desmanthus	30	y	y	hook	hook	crow	mimosa	M	foot	foot	n
ER4	F	juvenile	5	desmanthus	31	y	y	hook	hook	crow	mimosa	M	ground	ground	y
ER4	F	juvenile	5	desmanthus	32	y	y	hook	hook	crow	mimosa	S	foot	ground	n
ER4	F	juvenile	5	desmanthus	33	y	y	hook	hook	crow	mimosa	M	foot	foot	n
ER4	F	juvenile	5	desmanthus	34	y	y	hook	hook	crow	mimosa	M	foot	foot	n
ER4	F	juvenile	5	desmanthus	35	y	y	hook	hook	crow	mimosa	M	foot	foot	n
ER4	F	juvenile	5	desmanthus	36	y	y	hook	hook	crow	mimosa	M	foot	foot	n
EU7	F	immature	60	100sticks	22	y	y	stick	stick	crow	stick	M	ground	ground	n
EU7	F	immature	60	100sticks	23	y	y	stick	stick	crow	stick	M	ground	ground	n
EU7	F	immature	60	100sticks	25	y	y	stick	stick	crow	stick	S	corresponding_extraction_hole	corresponding_extraction_hole	n
EU7	F	immature	60	100sticks	26	y	y	stick	stick	crow	stick	S	corresponding_extraction_hole	corresponding_extraction_hole	y
EU7	F	immature	60	100sticks	28	y	y	stick	stick	crow	stick	S	corresponding_extraction_hole	corresponding_extraction_hole	n
EU7	F	immature	60	100sticks	32	y	y	stick	stick	crow	stick	S	corresponding_extraction_hole	corresponding_extraction_hole	n
EU7	F	immature	60	desmanthus	19	y	y	hook	hook	crow	mimosa	S	foot	foot	n
EU7	F	immature	60	desmanthus	20	y	y	hook	hook	crow	mimosa	S	corresponding_extraction_hole	corresponding_extraction_hole	n
EU7	F	immature	60	desmanthus	22	y	y	hook	hook	crow	mimosa	M	ground	ground	n
EU7	F	immature	60	desmanthus	23	y	y	hook	hook	crow	mimosa	M	foot	foot	n
EU7	F	immature	60	desmanthus	24	y	y	hook	hook	crow	mimosa	M	foot	foot	n
EU7	F	immature	60	desmanthus	25	y	y	hook	hook	crow	mimosa	S	corresponding_extraction_hole	corresponding_extraction_hole	n
EU7	F	immature	60	desmanthus	26	y	y	hook	hook	crow	mimosa	S	corresponding_extraction_hole	corresponding_extraction_hole	n
EU7	F	immature	60	desmanthus	27	y	y	hook	hook	crow	mimosa	M	foot	foot	y
EU7	F	immature	60	desmanthus	28	y	y	hook	hook	crow	mimosa	S	corresponding_extraction_hole	corresponding_extraction_hole	n
EU7	F	immature	60	desmanthus	29	y	y	hook	hook	crow	mimosa	M	foot	foot	n
EU7	F	immature	60	desmanthus	30	y	y	hook	hook	crow	mimosa	M	foot	ground	n
EU7	F	immature	60	desmanthus	31	y	y	hook	hook	crow	mimosa	M	foot	foot	n
EU7	F	immature	60	desmanthus	32	y	y	hook	hook	crow	mimosa	S	corresponding_extraction_hole	corresponding_extraction_hole	n
EU7	F	immature	60	desmanthus	33	y	y	hook	hook	crow	mimosa	M	foot	ground	n
EU7	F	immature	60	desmanthus	34	y	y	hook	hook	crow	mimosa	M	foot	foot	n
EU7	F	immature	60	desmanthus	35	y	y	hook	hook	crow	mimosa	M	foot	foot	n
EU7	F	immature	60	desmanthus	36	y	y	hook	hook	crow	mimosa	M	foot	foot	n
EU7	F	immature	60	matchedhook	19	y	y	matched_hook	hook	human	mimosa	S	corresponding_extraction_hole	corresponding_extraction_hole	n
EU7	F	immature	60	matchedhook	20	y	y	matched_hook	hook	human	mimosa	S	foot	foot	n
EU7	F	immature	60	matchedhook	21	y	y	matched_hook	hook	human	mimosa	M	foot	foot	n
EU7	F	immature	60	matchedhook	22	y	y	matched_hook	hook	human	mimosa	M	foot	foot	n
EU7	F	immature	60	matchedhook	23	y	y	matched_hook	hook	human	mimosa	M	foot	foot	n
EU7	F	immature	60	matchedhook	24	y	y	matched_hook	hook	human	mimosa	M	foot	foot	n
EU7	F	immature	60	matchedhook	25	y	y	matched_hook	hook	human	mimosa	S	foot	foot	n
EU7	F	immature	60	matchedhook	26	y	y	matched_hook	hook	human	mimosa	S	corresponding_extraction_hole	corresponding_extraction_hole	n
EU7	F	immature	60	matchedhook	27	y	y	matched_hook	hook	human	mimosa	M	foot	foot	n
EU7	F	immature	60	matchedhook	28	y	y	matched_hook	hook	human	mimosa	S	corresponding_extraction_hole	corresponding_extraction_hole	n
EU7	F	immature	60	matchedhook	29	y	y	matched_hook	hook	human	mimosa	M	log	ground	n
EU7	F	immature	60	matchedhook	30	y	y	matched_hook	hook	human	mimosa	M	foot	ground	y
EU7	F	immature	60	matchedhook	31	y	y	matched_hook	hook	human	mimosa	M	foot	foot	n
EU7	F	immature	60	matchedhook	32	y	y	matched_hook	hook	human	mimosa	S	corresponding_extraction_hole	corresponding_extraction_hole	n
EU7	F	immature	60	matchedhook	33	y	y	matched_hook	hook	human	mimosa	M	ground	ground	n
EU7	F	immature	60	matchedhook	34	y	y	matched_hook	hook	human	mimosa	M	foot	foot	n
EU7	F	immature	60	matchedhook	35	y	y	matched_hook	hook	human	mimosa	M	foot	foot	n
EU7	F	immature	60	matchedhook	36	y	y	matched_hook	hook	human	mimosa	M	foot	foot	n
EU7	F	immature	60	matchedstick	19	y	y	matched_stick	stick	human	mimosa	S	ground	ground	y
EU7	F	immature	60	matchedstick	20	y	y	matched_stick	stick	human	mimosa	S	foot	foot	n
EU7	F	immature	60	matchedstick	21	y	y	matched_stick	stick	human	mimosa	M	foot	foot	n
EU7	F	immature	60	matchedstick	22	y	y	matched_stick	stick	human	mimosa	M	foot	foot	n
EU7	F	immature	60	matchedstick	23	y	y	matched_stick	stick	human	mimosa	M	foot	foot	n
EU7	F	immature	60	matchedstick	24	y	y	matched_stick	stick	human	mimosa	M	foot	foot	n
EU7	F	immature	60	matchedstick	25	y	y	matched_stick	stick	human	mimosa	S	foot	foot	n
EU7	F	immature	60	matchedstick	26	y	y	matched_stick	stick	human	mimosa	S	foot	ground	y
EU7	F	immature	60	matchedstick	27	y	y	matched_stick	stick	human	mimosa	M	foot	foot	n
EU7	F	immature	60	matchedstick	28	y	y	matched_stick	stick	human	mimosa	S	foot	foot	n
EU7	F	immature	60	matchedstick	29	y	y	matched_stick	stick	human	mimosa	M	foot	foot	n
EU7	F	immature	60	matchedstick	30	y	y	matched_stick	stick	human	mimosa	M	foot	foot	n
EU7	F	immature	60	matchedstick	31	y	y	matched_stick	stick	human	mimosa	M	foot	foot	n
EU7	F	immature	60	matchedstick	32	y	y	matched_stick	stick	human	mimosa	S	corresponding_extraction_hole	corresponding_extraction_hole	n
EU7	F	immature	60	matchedstick	34	y	y	matched_stick	stick	human	mimosa	M	foot	foot	n
EU7	F	immature	60	matchedstick	35	y	y	matched_stick	stick	human	mimosa	M	foot	foot	n
EU7	F	immature	60	matchedstick	36	y	y	matched_stick	stick	human	mimosa	M	foot	foot	n
EV0	F	adult	95	100sticks	1	y	y	stick	stick	crow	stick	S	corresponding_extraction_hole	corresponding_extraction_hole	n
EV0	F	adult	95	100sticks	2	y	y	stick	stick	crow	stick	M	foot	foot	n
EV0	F	adult	95	100sticks	4	y	y	stick	stick	crow	stick	M	foot	foot	n
EV0	F	adult	95	100sticks	5	y	y	stick	stick	crow	stick	M	foot	foot	n
EV0	F	adult	95	100sticks	7	y	y	stick	stick	crow	stick	M	foot	foot	n
EV0	F	adult	95	100sticks	8	y	y	stick	stick	crow	stick	S	corresponding_extraction_hole	corresponding_extraction_hole	n
EV0	F	adult	95	100sticks	10	y	y	stick	stick	crow	stick	M	foot	foot	n
EV0	F	adult	95	100sticks	12	y	y	stick	stick	crow	stick	M	foot	foot	n
EV0	F	adult	95	100sticks	14	y	y	stick	stick	crow	stick	S	corresponding_extraction_hole	corresponding_extraction_hole	n
EV0	F	adult	95	100sticks	16	y	y	stick	stick	crow	stick	S	corresponding_extraction_hole	corresponding_extraction_hole	n
EV0	F	adult	95	100sticks	17	y	y	stick	stick	crow	stick	S	corresponding_extraction_hole	corresponding_extraction_hole	n
EV0	F	adult	95	desmanthus	1	y	y	hook	hook	crow	mimosa	S	corresponding_extraction_hole	corresponding_extraction_hole	n
EV0	F	adult	95	desmanthus	2	y	y	hook	hook	crow	mimosa	M	corresponding_extraction_hole	corresponding_extraction_hole	n
EV0	F	adult	95	desmanthus	3	y	y	hook	hook	crow	mimosa	M	corresponding_extraction_hole	corresponding_extraction_hole	n
EV0	F	adult	95	desmanthus	4	y	y	hook	hook	crow	mimosa	M	corresponding_extraction_hole	corresponding_extraction_hole	n
EV0	F	adult	95	desmanthus	5	y	y	hook	hook	crow	mimosa	M	corresponding_extraction_hole	corresponding_extraction_hole	n
EV0	F	adult	95	desmanthus	6	y	y	hook	hook	crow	mimosa	M	corresponding_extraction_hole	corresponding_extraction_hole	n
EV0	F	adult	95	desmanthus	7	y	y	hook	hook	crow	mimosa	M	foot	foot	n
EV0	F	adult	95	desmanthus	8	y	y	hook	hook	crow	mimosa	S	corresponding_extraction_hole	corresponding_extraction_hole	n
EV0	F	adult	95	desmanthus	9	y	y	hook	hook	crow	mimosa	M	corresponding_extraction_hole	corresponding_extraction_hole	n
EV0	F	adult	95	desmanthus	10	y	y	hook	hook	crow	mimosa	M	corresponding_extraction_hole	corresponding_extraction_hole	n
EV0	F	adult	95	desmanthus	11	y	y	hook	hook	crow	mimosa	M	corresponding_extraction_hole	corresponding_extraction_hole	n
EV0	F	adult	95	desmanthus	12	y	y	hook	hook	crow	mimosa	M	corresponding_extraction_hole	corresponding_extraction_hole	n
EV0	F	adult	95	desmanthus	13	y	y	hook	hook	crow	mimosa	S	corresponding_extraction_hole	corresponding_extraction_hole	n
EV0	F	adult	95	desmanthus	14	y	y	hook	hook	crow	mimosa	S	corresponding_extraction_hole	corresponding_extraction_hole	n
EV0	F	adult	95	desmanthus	15	y	y	hook	hook	crow	mimosa	M	corresponding_extraction_hole	corresponding_extraction_hole	n
EV0	F	adult	95	desmanthus	16	y	y	hook	hook	crow	mimosa	S	corresponding_extraction_hole	corresponding_extraction_hole	n
EV0	F	adult	95	desmanthus	17	y	y	hook	hook	crow	mimosa	S	corresponding_extraction_hole	corresponding_extraction_hole	n
EV0	F	adult	95	desmanthus	18	y	y	hook	hook	crow	mimosa	M	foot	foot	n
EV0	F	adult	95	matchedhook	1	y	y	matched_hook	hook	human	mimosa	S	corresponding_extraction_hole	corresponding_extraction_hole	n
EV0	F	adult	95	matchedhook	2	y	y	matched_hook	hook	human	mimosa	M	corresponding_extraction_hole	corresponding_extraction_hole	n
EV0	F	adult	95	matchedhook	3	y	y	matched_hook	hook	human	mimosa	M	corresponding_extraction_hole	corresponding_extraction_hole	n
EV0	F	adult	95	matchedhook	4	y	y	matched_hook	hook	human	mimosa	M	corresponding_extraction_hole	corresponding_extraction_hole	n
EV0	F	adult	95	matchedhook	5	y	y	matched_hook	hook	human	mimosa	M	corresponding_extraction_hole	corresponding_extraction_hole	n
EV0	F	adult	95	matchedhook	6	y	y	matched_hook	hook	human	mimosa	M	corresponding_extraction_hole	corresponding_extraction_hole	n
EV0	F	adult	95	matchedhook	7	y	y	matched_hook	hook	human	mimosa	M	corresponding_extraction_hole	corresponding_extraction_hole	n
EV0	F	adult	95	matchedhook	8	y	y	matched_hook	hook	human	mimosa	S	corresponding_extraction_hole	corresponding_extraction_hole	n
EV0	F	adult	95	matchedhook	9	y	y	matched_hook	hook	human	mimosa	M	corresponding_extraction_hole	corresponding_extraction_hole	n
EV0	F	adult	95	matchedhook	10	y	y	matched_hook	hook	human	mimosa	M	corresponding_extraction_hole	corresponding_extraction_hole	n
EV0	F	adult	95	matchedhook	11	y	y	matched_hook	hook	human	mimosa	M	foot	foot	n
EV0	F	adult	95	matchedhook	12	y	y	matched_hook	hook	human	mimosa	M	corresponding_extraction_hole	corresponding_extraction_hole	n
EV0	F	adult	95	matchedhook	13	y	y	matched_hook	hook	human	mimosa	S	corresponding_extraction_hole	corresponding_extraction_hole	n
EV0	F	adult	95	matchedhook	14	y	y	matched_hook	hook	human	mimosa	S	corresponding_extraction_hole	corresponding_extraction_hole	n
EV0	F	adult	95	matchedhook	15	y	y	matched_hook	hook	human	mimosa	M	foot	foot	n
EV0	F	adult	95	matchedhook	16	y	y	matched_hook	hook	human	mimosa	S	corresponding_extraction_hole	corresponding_extraction_hole	n
EV0	F	adult	95	matchedhook	17	y	y	matched_hook	hook	human	mimosa	S	corresponding_extraction_hole	corresponding_extraction_hole	n
EV0	F	adult	95	matchedhook	18	y	y	matched_hook	hook	human	mimosa	M	foot	foot	n
EV0	F	adult	95	matchedstick	1	y	y	matched_stick	stick	human	mimosa	S	corresponding_extraction_hole	corresponding_extraction_hole	n
EV0	F	adult	95	matchedstick	8	y	y	matched_stick	stick	human	mimosa	S	corresponding_extraction_hole	corresponding_extraction_hole	n
EV3	M	immature	40	100sticks	10	y	y	stick	stick	crow	stick	M	foot	foot	n
EV3	M	immature	40	100sticks	11	y	y	stick	stick	crow	stick	M	corresponding_extraction_hole	corresponding_extraction_hole	n
EV3	M	immature	40	100sticks	13	y	y	stick	stick	crow	stick	M	foot	foot	n
EV3	M	immature	40	100sticks	14	y	y	stick	stick	crow	stick	M	corresponding_extraction_hole	corresponding_extraction_hole	n
EV3	M	immature	40	100sticks	15	y	y	stick	stick	crow	stick	M	foot	foot	n
EV3	M	immature	40	100sticks	16	y	y	stick	stick	crow	stick	S	corresponding_extraction_hole	corresponding_extraction_hole	y
EV3	M	immature	40	desmanthus	5	y	y	hook	hook	crow	mimosa	M	foot	foot	n
EV3	M	immature	40	desmanthus	9	y	y	hook	hook	crow	mimosa	M	foot	foot	n
EV3	M	immature	40	desmanthus	10	y	y	hook	hook	crow	mimosa	M	corresponding_extraction_hole	corresponding_extraction_hole	n
EV3	M	immature	40	desmanthus	11	y	y	hook	hook	crow	mimosa	M	corresponding_extraction_hole	corresponding_extraction_hole	n
EV3	M	immature	40	desmanthus	13	y	y	hook	hook	crow	mimosa	M	corresponding_extraction_hole	foot	n
EV3	M	immature	40	desmanthus	14	y	y	hook	hook	crow	mimosa	M	foot	ground	y
HA7	F	immature	25	100sticks	19	y	y	stick	stick	crow	stick	S	corresponding_extraction_hole	corresponding_extraction_hole	n
HA7	F	immature	25	100sticks	20	y	y	stick	stick	crow	stick	M	foot	foot	n
HA7	F	immature	25	100sticks	28	y	y	stick	stick	crow	stick	S	corresponding_extraction_hole	corresponding_extraction_hole	n
HA7	F	immature	25	100sticks	29	y	y	stick	stick	crow	stick	S	ground	ground	n
HA7	F	immature	25	100sticks	32	y	y	stick	stick	crow	stick	S	ground	ground	y
HA7	F	immature	25	desmanthus	19	y	y	hook	hook	crow	mimosa	S	corresponding_extraction_hole	corresponding_extraction_hole	y
HA7	F	immature	25	desmanthus	20	y	y	hook	hook	crow	mimosa	M	foot	foot	n
HA7	F	immature	25	desmanthus	21	y	y	hook	hook	crow	mimosa	M	foot	foot	n
HA7	F	immature	25	desmanthus	22	y	y	hook	hook	crow	mimosa	M	corresponding_extraction_hole	corresponding_extraction_hole	n
HA7	F	immature	25	desmanthus	23	y	y	hook	hook	crow	mimosa	M	corresponding_extraction_hole	corresponding_extraction_hole	n
HA7	F	immature	25	desmanthus	24	y	y	hook	hook	crow	mimosa	M	foot	foot	n
HA7	F	immature	25	desmanthus	25	y	y	hook	hook	crow	mimosa	M	foot	foot	n
HA7	F	immature	25	desmanthus	26	y	y	hook	hook	crow	mimosa	M	corresponding_extraction_hole	corresponding_extraction_hole	n
HA7	F	immature	25	desmanthus	27	y	y	hook	hook	crow	mimosa	M	ground	ground	n
HA7	F	immature	25	desmanthus	28	y	y	hook	hook	crow	mimosa	M	corresponding_extraction_hole	corresponding_extraction_hole	n
HA7	F	immature	25	desmanthus	29	y	y	hook	hook	crow	mimosa	S	corresponding_extraction_hole	corresponding_extraction_hole	n
HA7	F	immature	25	desmanthus	30	y	y	hook	hook	crow	mimosa	M	corresponding_extraction_hole	corresponding_extraction_hole	n
HA7	F	immature	25	desmanthus	31	y	y	hook	hook	crow	mimosa	S	foot	foot	n
HA7	F	immature	25	desmanthus	32	y	y	hook	hook	crow	mimosa	S	corresponding_extraction_hole	corresponding_extraction_hole	n
HA7	F	immature	25	desmanthus	34	y	y	hook	hook	crow	mimosa	M	foot	foot	n
HA7	F	immature	25	desmanthus	35	y	y	hook	hook	crow	mimosa	M	corresponding_extraction_hole	ground	n
HA7	F	immature	25	matchedhook	19	y	y	matched_hook	hook	human	mimosa	S	corresponding_extraction_hole	corresponding_extraction_hole	n
HA7	F	immature	25	matchedhook	21	y	y	matched_hook	hook	human	mimosa	M	foot	foot	n
HA7	F	immature	25	matchedhook	22	y	y	matched_hook	hook	human	mimosa	M	foot	foot	n
HA7	F	immature	25	matchedhook	23	y	y	matched_hook	hook	human	mimosa	M	foot	foot	n
HA7	F	immature	25	matchedhook	24	y	y	matched_hook	hook	human	mimosa	M	foot	foot	n
HA7	F	immature	25	matchedhook	25	y	y	matched_hook	hook	human	mimosa	M	corresponding_extraction_hole	foot	n
HA7	F	immature	25	matchedhook	26	y	y	matched_hook	hook	human	mimosa	M	corresponding_extraction_hole	corresponding_extraction_hole	n
HA7	F	immature	25	matchedhook	27	y	y	matched_hook	hook	human	mimosa	M	foot	foot	n
HA7	F	immature	25	matchedhook	28	y	y	matched_hook	hook	human	mimosa	S	corresponding_extraction_hole	corresponding_extraction_hole	n
HA7	F	immature	25	matchedhook	29	y	y	matched_hook	hook	human	mimosa	S	corresponding_extraction_hole	corresponding_extraction_hole	n
HA7	F	immature	25	matchedhook	30	y	y	matched_hook	hook	human	mimosa	M	corresponding_extraction_hole	corresponding_extraction_hole	n
HA7	F	immature	25	matchedhook	31	y	y	matched_hook	hook	human	mimosa	S	corresponding_extraction_hole	corresponding_extraction_hole	n
HA7	F	immature	25	matchedhook	32	y	y	matched_hook	hook	human	mimosa	S	corresponding_extraction_hole	corresponding_extraction_hole	n
HA7	F	immature	25	matchedhook	33	y	y	matched_hook	hook	human	mimosa	M	corresponding_extraction_hole	corresponding_extraction_hole	y
HA7	F	immature	25	matchedhook	34	y	y	matched_hook	hook	human	mimosa	M	foot	foot	n
HA7	F	immature	25	matchedhook	35	y	y	matched_hook	hook	human	mimosa	S	corresponding_extraction_hole	corresponding_extraction_hole	n
HA7	F	immature	25	matchedhook	36	y	y	matched_hook	hook	human	mimosa	M	foot	foot	n
HA7	F	immature	25	matchedstick	20	y	y	matched_stick	stick	human	mimosa	S	ground	ground	y
HA7	F	immature	25	matchedstick	29	y	y	matched_stick	stick	human	mimosa	S	foot	foot	n
HA7	F	immature	25	matchedstick	31	y	y	matched_stick	stick	human	mimosa	S	corresponding_extraction_hole	corresponding_extraction_hole	n
HA7	F	immature	25	matchedstick	32	y	y	matched_stick	stick	human	mimosa	S	corresponding_extraction_hole	corresponding_extraction_hole	n
HA7	F	immature	25	matchedstick	35	y	y	matched_stick	stick	human	mimosa	S	ground	ground	y
HA8	F	immature	20	100sticks	1	y	y	stick	stick	crow	stick	S	ground	ground	y
HA8	F	immature	20	100sticks	2	y	y	stick	stick	crow	stick	S	corresponding_extraction_hole	corresponding_extraction_hole	n
HA8	F	immature	20	100sticks	4	y	y	stick	stick	crow	stick	S	corresponding_extraction_hole	corresponding_extraction_hole	n
HA8	F	immature	20	100sticks	6	y	y	stick	stick	crow	stick	M	corresponding_extraction_hole	corresponding_extraction_hole	n
HA8	F	immature	20	100sticks	7	y	y	stick	stick	crow	stick	S	corresponding_extraction_hole	corresponding_extraction_hole	n
HA8	F	immature	20	100sticks	8	y	y	stick	stick	crow	stick	S	corresponding_extraction_hole	corresponding_extraction_hole	n
HA8	F	immature	20	100sticks	9	y	y	stick	stick	crow	stick	M	corresponding_extraction_hole	corresponding_extraction_hole	n
HA8	F	immature	20	100sticks	10	y	y	stick	stick	crow	stick	M	ground	ground	y
HA8	F	immature	20	100sticks	11	y	y	stick	stick	crow	stick	M	ground	ground	y
HA8	F	immature	20	100sticks	13	y	y	stick	stick	crow	stick	S	corresponding_extraction_hole	corresponding_extraction_hole	n
HA8	F	immature	20	100sticks	14	y	y	stick	stick	crow	stick	M	corresponding_extraction_hole	corresponding_extraction_hole	n
HA8	F	immature	20	100sticks	15	y	y	stick	stick	crow	stick	M	corresponding_extraction_hole	corresponding_extraction_hole	n
HA8	F	immature	20	100sticks	16	y	y	stick	stick	crow	stick	M	corresponding_extraction_hole	corresponding_extraction_hole	n
HA8	F	immature	20	desmanthus	1	y	y	hook	hook	crow	mimosa	S	corresponding_extraction_hole	corresponding_extraction_hole	n
HA8	F	immature	20	desmanthus	2	y	y	hook	hook	crow	mimosa	S	ground	ground	y
HA8	F	immature	20	desmanthus	3	y	y	hook	hook	crow	mimosa	M	corresponding_extraction_hole	corresponding_extraction_hole	n
HA8	F	immature	20	desmanthus	4	y	y	hook	hook	crow	mimosa	S	corresponding_extraction_hole	corresponding_extraction_hole	n
HA8	F	immature	20	desmanthus	5	y	y	hook	hook	crow	mimosa	M	corresponding_extraction_hole	corresponding_extraction_hole	y
HA8	F	immature	20	desmanthus	6	y	y	hook	hook	crow	mimosa	M	corresponding_extraction_hole	corresponding_extraction_hole	n
HA8	F	immature	20	desmanthus	8	y	y	hook	hook	crow	mimosa	S	corresponding_extraction_hole	corresponding_extraction_hole	n
HA8	F	immature	20	desmanthus	9	y	y	hook	hook	crow	mimosa	M	corresponding_extraction_hole	corresponding_extraction_hole	n
HA8	F	immature	20	desmanthus	10	y	y	hook	hook	crow	mimosa	M	ground	ground	y
HA8	F	immature	20	desmanthus	11	y	y	hook	hook	crow	mimosa	M	ground	ground	y
HA8	F	immature	20	desmanthus	12	y	y	hook	hook	crow	mimosa	M	ground	ground	n
HA8	F	immature	20	desmanthus	31	y	y	hook	hook	crow	mimosa	S	corresponding_extraction_hole	corresponding_extraction_hole	n
HA8	F	immature	20	desmanthus	32	y	y	hook	hook	crow	mimosa	M	corresponding_extraction_hole	corresponding_extraction_hole	n
HA8	F	immature	20	desmanthus	33	y	y	hook	hook	crow	mimosa	M	corresponding_extraction_hole	corresponding_extraction_hole	n
HA8	F	immature	20	desmanthus	35	y	y	hook	hook	crow	mimosa	M	corresponding_extraction_hole	corresponding_extraction_hole	n
HA8	F	immature	20	desmanthus	36	y	y	hook	hook	crow	mimosa	M	corresponding_extraction_hole	corresponding_extraction_hole	n
HJ6	M	immature	35	desmanthus	20	y	y	hook	hook	crow	mimosa	M	corresponding_extraction_hole	corresponding_extraction_hole	n
HJ6	M	immature	35	desmanthus	29	y	y	hook	hook	crow	mimosa	M	foot	other_extraction_hole	n
